# Supplementary material for: The network BiodiversityKnowledge in practice: insights from three trial assessments
Source: Springer Nature journal article supplement (doi:10.1007/s10531-016-1128-4), 2016-05-30
Supplement: MOESM2 [file 10210894]

1 Stefan Schindler<sup>1,2,3</sup>, Barbara Livoreil<sup>4,5</sup>, Isabel Sousa Pinto<sup>6,7</sup>, Rita Araújo<sup>6</sup>, Klaus Peter Zulka<sup>2,8</sup>, Andrew S.  
2 Pullin<sup>5</sup>, Luis Santamaria<sup>9</sup>, Michaela Kropik<sup>1</sup>, Pablo Fernandez-Mendez<sup>9</sup>, Thomas Wrba<sup>1</sup>

3 **The network Biodiversity Knowledge in practice: insights from three trial**  
4 **assessments**

5 **Affiliations**

6 <sup>1</sup> University of Vienna, Department of Botany and Biodiversity Research, Division of Conservation Biology,  
7 Vegetation Ecology and Landscape Ecology, Rennweg 14, 1030 Vienna, Austria

8 <sup>2</sup> Environment Agency Austria, Department of Biodiversity and Nature Conservation, Spittelauer Lände 5, 1090  
9 Vienna, Austria

10 <sup>3</sup> CIBIO/InBio, Centro de Investigação em Biodiversidade e Recursos Genéticos, Universidade do Porto,  
11 Campus Agrário de Vairão, 4485-601 Vairão, Portugal

12 <sup>4</sup> Centre for Evidence-Based Conservation, Bangor University, Bangor, Gwynedd, LL57 2DG, UK

13 <sup>5</sup> Foundation for Research on Biodiversity (FRB), 195 rue Saint Jacques, 75005 Paris, France

14 <sup>6</sup> Interdisciplinary Centre of Marine and Environmental Research (CIMAR), University of Porto, Rua dos Bragas  
15 289, 4050-123 Porto, Portugal

16 <sup>7</sup> Department of Biology, Faculty of Sciences, University of Porto, R. Do Campo Alegre s/n. Porto, Portugal

17 <sup>8</sup> University of Vienna, Department of Integrative Zoology, Althanstraße 14, 1090 Vienna, Austria

18 <sup>9</sup> Doñana Biological Station (EBD-CSIC), C/ Americo Vesputio s/n, Isla de la Cartuja, 41092 Sevilla, Spain

19

20 **Corresponding author:**

21 [stefan.schindler@umweltbundesamt.at](mailto:stefan.schindler@umweltbundesamt.at)

22 telephone: 0043 650 5460 5771

23

24

25

26 **Online Resource 2.** Overview on lessons learned from the three trial assessments during preparation, conduction and finalization phase. Issues relevant for more than one phase  
 27 are only described at the first phase they occurred.

| Phase                    | Issue                                                                    | Background and lesson learned                                                                                                                                                                                                                                                                                                                   | Recommendations                                                                                                                                                                                                                                                                                                                                                                                                                                                                     | Relevant trial assessment              |
|--------------------------|--------------------------------------------------------------------------|-------------------------------------------------------------------------------------------------------------------------------------------------------------------------------------------------------------------------------------------------------------------------------------------------------------------------------------------------|-------------------------------------------------------------------------------------------------------------------------------------------------------------------------------------------------------------------------------------------------------------------------------------------------------------------------------------------------------------------------------------------------------------------------------------------------------------------------------------|----------------------------------------|
| <b>Preparation phase</b> |                                                                          |                                                                                                                                                                                                                                                                                                                                                 |                                                                                                                                                                                                                                                                                                                                                                                                                                                                                     |                                        |
|                          | Expert engagement                                                        | <ul style="list-style-type: none"> <li>• Communication with experts worked fine, but involvement and engagement wasn't always as strong as required to receive a diverse and reliable feedback;</li> <li>• Personal contact and face-to-face meetings (e.g. workshops) were an important tool to increase involvement and engagement</li> </ul> | <ul style="list-style-type: none"> <li>• Make knowledge holders proactively aware of the opportunities offered by BiodiversityKnowledge (including coauthorship of assessments)</li> <li>• Conduct dissemination and training courses and provide knowledge holders with targeted information at the webpage and targeted alerts to fully exploit the advantages of BiodiversityKnowledge for them</li> <li>• Use experts with high reputation to contact knowledge hubs</li> </ul> | Marine<br>Agricultural<br>Conservation |
|                          | Scoping phase                                                            | <ul style="list-style-type: none"> <li>• Broad, open framed, and potentially complex questions from decisions-makers are difficult to address with conventional scientific methods;</li> <li>• Expectations of requesters of broad and open questions can be difficult to meet.</li> </ul>                                                      | <ul style="list-style-type: none"> <li>• Break down broad policy questions to a set of manageable ones</li> <li>• Dedicate enough effort to the scoping process with requesters</li> <li>• Identify as soon as possible a list of possible interventions or actions that are in the focus of the assessment</li> <li>• Involve requesters at several stages to avoid false expectations regarding outcomes and uncertainties.</li> </ul>                                            | Marine<br>Agricultural<br>Conservation |
|                          | Engaging of policy-makers on emerging questions                          | <ul style="list-style-type: none"> <li>• For emerging questions raised by researchers, lack of interest of policy-makers might be an obstacle for a sufficient uptake of results by policy-makers</li> </ul>                                                                                                                                    | <ul style="list-style-type: none"> <li>• Aim at dialogue and co-construction of requests with requesters also for emerging questions;</li> <li>• Produce particularly convincing and targeted outputs.</li> </ul>                                                                                                                                                                                                                                                                   | Marine                                 |
|                          | Dialogue with requester                                                  | <ul style="list-style-type: none"> <li>• A regular dialogue with the requester is required during the assessment, particularly in the preparation phase</li> </ul>                                                                                                                                                                              | <ul style="list-style-type: none"> <li>• Agree with one person to act as formal requester or representative of requesters to favour effective dialogue.</li> </ul>                                                                                                                                                                                                                                                                                                                  | Conservation                           |
|                          | Engagement of experts with high reputation                               | <ul style="list-style-type: none"> <li>• Experts and researchers with high reputation might not be interested in participating in conducting synthesis work</li> </ul>                                                                                                                                                                          | <ul style="list-style-type: none"> <li>• Build a mixed team for assessments with researchers of highest reputation being involved as peer-reviewers and for the most scientific aspects of it</li> <li>• The remaining work could be delegated to person with targeted skills to increase cost-effectiveness.</li> </ul>                                                                                                                                                            | Agricultural<br>Conservation           |
|                          | Search for completed or ongoing reviews on the same or similar questions | <ul style="list-style-type: none"> <li>• The detection and consideration of completed or ongoing reviews is very important during the scoping</li> <li>• Such reviews might not exactly answer the posed question, but they may serve as an entry point to contact experts</li> </ul>                                                           | <ul style="list-style-type: none"> <li>• Assess scope and quality of published and ongoing reviews at an early stage of the scoping.</li> </ul>                                                                                                                                                                                                                                                                                                                                     | Agricultural                           |
|                          | Reputation of BiodiversityKnowledge                                      | <ul style="list-style-type: none"> <li>• The low reputation of BiodiversityKnowledge in its prototype stage was a barrier to credibility, relevance, legitimacy and expert/stakeholder involvement</li> </ul>                                                                                                                                   | <ul style="list-style-type: none"> <li>• Care must be taken to continuously increase credibility, relevance and legitimacy of BiodiversityKnowledge and its products</li> <li>• Raise awareness and disseminate activities to optimize the reputation of BiodiversityKnowledge</li> </ul>                                                                                                                                                                                           | Marine<br>Agricultural<br>Conservation |

| Phase                     | Issue                                                             | Background and lesson learned                                                                                                                                                                                                                                                                                                                                                  | Recommendations                                                                                                                                                                                                                             | Relevant trial assessment              |
|---------------------------|-------------------------------------------------------------------|--------------------------------------------------------------------------------------------------------------------------------------------------------------------------------------------------------------------------------------------------------------------------------------------------------------------------------------------------------------------------------|---------------------------------------------------------------------------------------------------------------------------------------------------------------------------------------------------------------------------------------------|----------------------------------------|
|                           | Outputs and communication means                                   | <ul style="list-style-type: none"> <li>Finalize preliminary outputs for communication</li> <li>A flyer was successful in raising interest about progress</li> </ul>                                                                                                                                                                                                            | <ul style="list-style-type: none"> <li>Start communicating broadly at the onset of the project to increase the chance to engage with stakeholders not yet identified</li> </ul>                                                             | Agricultural<br>Conservation           |
| <b>Conduction phase</b>   |                                                                   |                                                                                                                                                                                                                                                                                                                                                                                |                                                                                                                                                                                                                                             |                                        |
|                           | Different types of knowledge and combination of different methods | <ul style="list-style-type: none"> <li>It was demanding to access and synthesize alternative forms of knowledge including practical experience or local knowledge</li> <li>Modular approaches, where some aspects of knowledge were assessed by means of reviewing evidence and others by expert consultations were applied in the conservation and the marine case</li> </ul> | <ul style="list-style-type: none"> <li>For broader assessments where different kinds of knowledge are relevant, consider modular approaches where different aspects are tackled with different approaches</li> </ul>                        | Marine<br>Agricultural<br>Conservation |
|                           | Librarians as part of working groups                              | <ul style="list-style-type: none"> <li>Professional librarians were highly valuable team members and enjoyed the exercise</li> </ul>                                                                                                                                                                                                                                           | <ul style="list-style-type: none"> <li>Consider librarians when composing working groups</li> </ul>                                                                                                                                         | Agricultural                           |
|                           | Composition of working groups                                     | <ul style="list-style-type: none"> <li>The heterogeneity of the knowledge holders and users is a challenge and an opportunity in terms of achieving efficient knowledge exchange and synthesis</li> </ul>                                                                                                                                                                      | <ul style="list-style-type: none"> <li>Select working group members with targeted skills and a transdisciplinary mind-set</li> </ul>                                                                                                        | Marine<br>Conservation                 |
|                           | Broad policy questions and knowledge gaps                         | <ul style="list-style-type: none"> <li>Broad policy questions entail large amounts of knowledge, to potentially hampering an effective review of evidence, and large knowledge gaps, owing to the multiplication of entities, interventions and combinations thereof</li> </ul>                                                                                                | <ul style="list-style-type: none"> <li>Assess to which extent generalizations can be made out despite the encountered knowledge gaps</li> </ul>                                                                                             | Agricultural<br>Conservation<br>Marine |
|                           | Heterogeneity of data and evidence                                | <ul style="list-style-type: none"> <li>Variability of study design and knowledge availability makes it challenging to quantitatively summarize knowledge and to reach solid conclusions</li> </ul>                                                                                                                                                                             | <ul style="list-style-type: none"> <li>Critically appraise the collected knowledge and choose appropriate methods for summarizing</li> <li>Consider presenting only a descriptive map of the 'knowledge landscape' in such cases</li> </ul> | Agricultural<br>Conservation           |
| <b>Finalization phase</b> |                                                                   |                                                                                                                                                                                                                                                                                                                                                                                |                                                                                                                                                                                                                                             |                                        |
|                           | Emerging perspectives and research needs                          | <ul style="list-style-type: none"> <li>The assessments may open up to new perspectives for research and synthesis</li> </ul>                                                                                                                                                                                                                                                   | <ul style="list-style-type: none"> <li>Intend fundraise for subsequent requests that should be more targeted and supported by preliminary analyses of the first assessment</li> </ul>                                                       | Agricultural                           |
|                           | Policy brief                                                      | <ul style="list-style-type: none"> <li>Commitment of experts and stakeholders beyond the assessment period is of key importance for uptake of policy documents by EU, national and regional policy-makers</li> </ul>                                                                                                                                                           | <ul style="list-style-type: none"> <li>Adequately fund the finalization/outreach period as integral part of the assessment, in particularly for horizon-scanning requests</li> </ul>                                                        | Marine<br>Agriculture<br>Conservation  |

28

29
